# Supplementary figures and images for: Transient expression of Mnb/Dyrk1a couples cell cycle exit and differentiation of neuronal precursors by inducing p27KIP1 expression and suppressing NOTCH signaling
Source: Oxford University Press journal article supplement (doi:10.1242/dev.066167), 2011-05-24

**GFPCASPASE3**

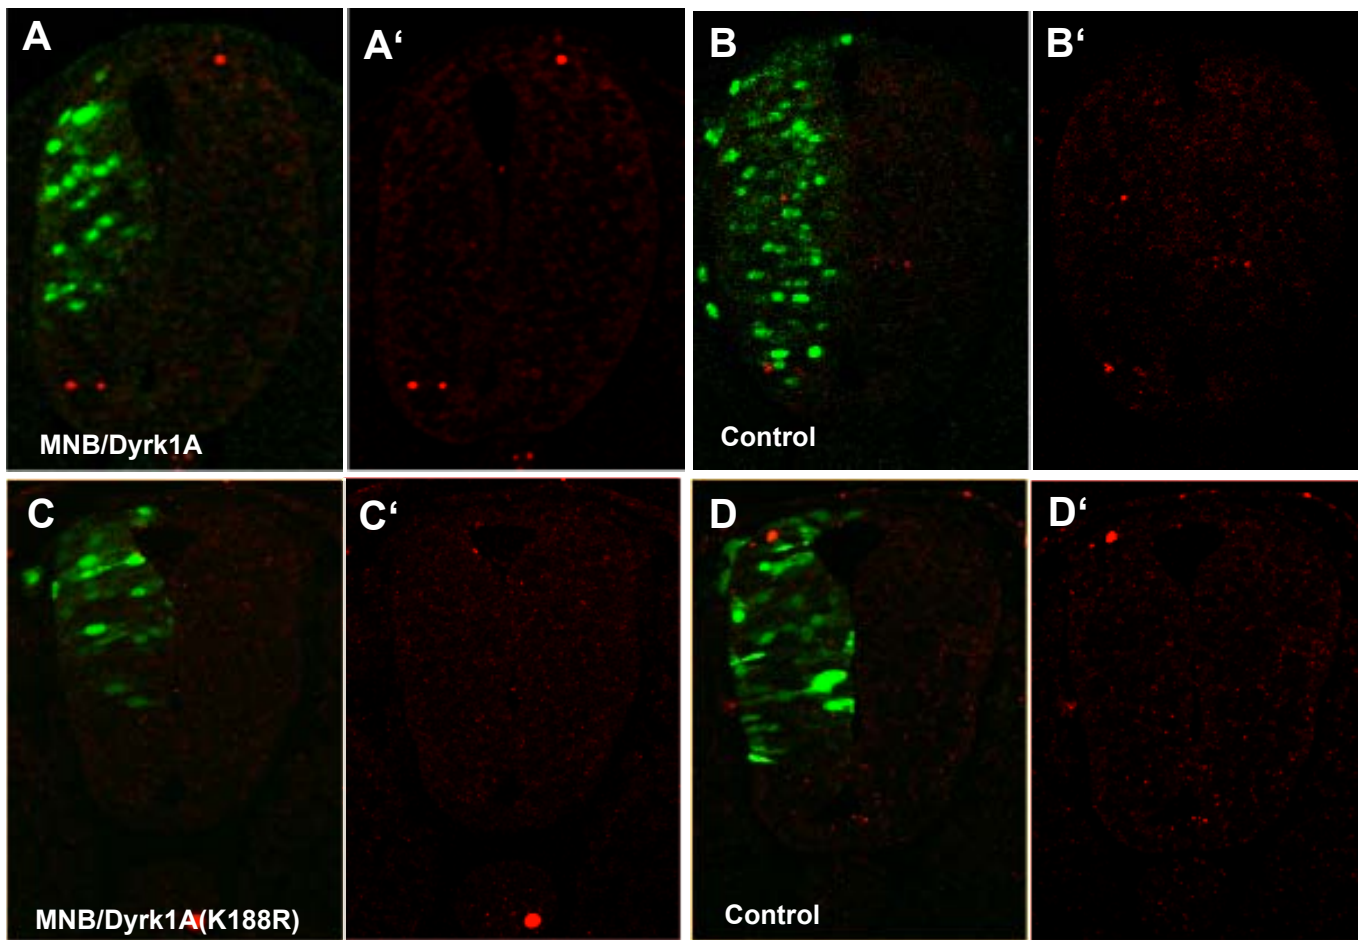

Supplement: dev066167figs3.pdf [file dev066167figs3.pdf]
